# Supplementary material for: Predictive Modeling of In Vivo Response to Gemcitabine in Pancreatic Cancer
Source: PLoS Comput Biol. 2013 Sep 19;9(9):e1003231. doi: 10.1371/journal.pcbi.1003231 (PMC3777914; doi:10.1371/journal.pcbi.1003231)
Supplement: Text S1 — Supplemental material. (DOC) [file pcbi.1003231.s005.doc]

**SUPPLEMENT**

**Microvessel density (MVD)** is a measure of the number of vessels per regions of interest (ROI). Histology slides of both normal pancreas and tumor tissue (**Figure S1**)were examined. The MVD was estimated by evaluating various ROI of pancreatic cells from slides stained for Factor VIII. Microvessels with approximate circular diameters were identified within an ROI at a magnification of either 40x (1.21 m/pixel) or 100x (0.48 m/pixel) (**Figure S1D**). The pixels were converted to metric unit lengths and the sum of the microvessel cross-sectional areas was calculated as a ratio to the ROI area, with the resulting microvessel density obtained as a percentage.

**Calculation of tumor cell density.** Within a given circular ROI, the cell number was counted and divided over the ROI area. This cell density was averaged over 5 separate ROIs to yield an estimated packing density of 0.761. **Figure S2** illustrates how cells were identified within an ROI. A sample calculation is as follows:


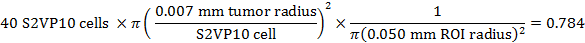


**Calculation of tumor size from bioluminescence.** The bioluminescence signal was quantified from the orthotopic xenografts after injection with luciferin. On Day 0, a specified number of MiaPaCa-2 or S2-VP10 tumor cells were orthotopically injected into the mouse pancreas, followed by luciferin injection and tumor imaging. Day 0 provided a correlation of the bioluminescent signal (photons/s) to the cell concentration, with the lowest concentration of cells providing the most reliable correlation. By day 14 and day 7, the MiaPaCa-2 and S2-VP10 tumor cells, respectively, had both taken root and grown to a typical size of ~1.5 mm radius tumor. A correction factor of the photon/sec/cell correlation was determined to adjust the bioluminescent emission signal to account for the tumor size calculation to the typical diameter of 3 mm. **Table S1** summarizes a sample set of the bioluminescent emission data for untreated mice at day 7 post-orthotopic injection of S2-VP10 tumor cells. The median value was used to calculate the tumor radius. Following is a sample calculation showing how the correction factor and tumor radius were obtained.

Calculation of bioluminescent emission signal correlation to cell concentration on Day 0:


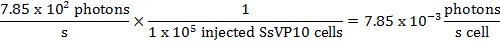


Calculation of correction factor on Day 7 with known tumor diameter of 3 mm:


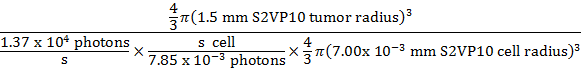


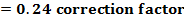


Calculation of tumor radius from median of bioluminescent emission data:


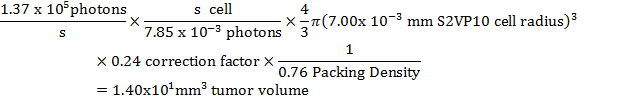


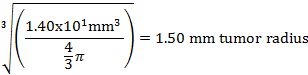


**Mathematical Model**

We summarize the formulation advanced by Cristini et al. (2003) [21] and further developed in [18,22-24] to illustrate the basic model applied in this integrated experimental/computational approach to study pancreatic tumor growth and treatment response. The quasi-steady state diffusion equation for the concentration (**x***,t*) of cell substrates is [25-27]:

(8)

where *D* is the diffusion coefficient and  is the rate at which cell substrates are added to the tumor domain  The substrates diffuse through the extracellular matrix (ECM), as well as within cells, and are uptaken by tumor cells. The assumption of steady state diffusion [26] is reasonable considering that the rate of diffusion is much smaller (~1 min-1) than the rate of cell proliferation (~1 day-1). The rate  is given by [21]:

(9)

This rate includes cell substrates from the vasculature as a source, and the uptake by the cells as a sink. The rate *λ*B is the substrate vasculature-tissue transfer rate, *σ*B is the concentration of substrates in the vasculature, and *λ* is the rate of substrate consumption by tumor cells.

The local rate of tumor volume change as a function of velocity **u** is obtained by modeling the tumor as an incompressible fluid [21]:

(10)

The cell proliferation rate *λP* is defined as [21]:

(11)

where *b* is a measure of mitosis and
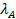
 is the rate of apoptosis, both assumed to be uniform.

The velocity **u** is assumed to follow Darcy’s law [48]:

(12)

where the cell mobility *μ* is assumed constant and is the pressure in the tumor domain
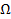
.

The boundary condition for the cell substrate concentration at is , where is the uniform concentration outside the tumor volume [21]. The characteristic mitosis rate is a function of this concentration:

*λ*M = *bσ*∞ (13)

The tumor pressure is assumed to satisfy the Laplace-Young boundary condition, where γ is the surface tension related to cell-cell adhesive forces, and Κ is the local total curvature [21].

The tumor velocity normal to the tumor boundary is [21]:

(14)

The vasculature is assumed to be uniform in this simplified model, and thus the tumor growth is associated with a bulk source of oxygen, nutrients and growth factors [21]. Hence, the growth is limited by the diffusion of cell substrates through the tumor tissue.

An intrinsic length scale in the model is revealed by **Eqs.8-9** [21]:

(15)

By non-dimensionalizing the lengths with *LD* one obtains from **Eq.12** and the pressure Laplace-Young boundary condition an intrinsic relaxation time scale corresponding to [21]. This rate, associated to relaxation mechanisms such as surface tension γ and cell mobility μ, is used to non-dimensionalize the simulation time.

The dimensionless parameters *A* and *G* and the modified concentration
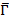
 and pressure are specified such that [21]:

The dimensionless parameter *B* denoting the extent of vascularization becomes [21]:

(16)

As described in [21], the non-dimensional equation for
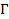
 (**Eq.1**) with boundary condition is obtained from **Eqs.9-10** and . The non-dimensional equation for *p* (**Eq.2**) with boundary condition is obtained from **Eqs.10-12** and . The non-dimensional normal velocity *V* of the tumor-host interface (**Eq.3**) is obtained from **Eq.14**.

The bars denoting non-dimensionalized values are omitted in the **Methods**. The main model parameters and their associated biological meaning are summarized in **Table S2**.

**SUPPLEMENTAL REFERENCE**

48. Greenspan HP (1972) Models for the Growth of a Solid Tumor by diffusion. Stud Appl Math LI 4: 317–340.
